# Supplementary material for: Genome-wide association and RNA-seq analyses reveal a potential gene related to linolenic acid in soybean seeds
Source: PeerJ. 2023 Nov 2;11:e16138. doi: 10.7717/peerj.16138 (PMC10625760; doi:10.7717/peerj.16138)
Supplement: Supplemental Information 8 [file peerj-11-16138-s008.xlsx]

## Sheet: The GmWRI14 expression in diffe
The GmWRI14 expression in different tissues
gene	PolyA-bud		PolyA-cotyledon_seed	PolyA-cotyledon_seedling	PolyA-embryo	PolyA-flower	PolyA-hypocotyl	PolyA-internode	PolyA-node	PolyA-R2_flower_pedicel	PolyA-R2_flower_abscission_zone	PolyA-R3_pod_pedicel	PolyA-R3_pod_abscission_zone	PolyA-R5_pod_pedicel	PolyA-R5_pod_abscission_zone	PolyA-root_elongation	PolyA-root_mature	PolyA-root_tip	PolyA-true_leaf
GmWRI14 -1	0.346358		5.61496	0.0820119	1.89863	0.117475	0.356376	0.140782	0.0973285	0.0413756	0.0508005	0.07626	0.118137	0	0.0763115	0.772653	1.02445	2.72537	0.0698181
GmWRI14 -2	0.53766		4.5803	0.0723	2.32331	0.0170162	0.342212	0.189401	0.063431	0.052685	0.0525726	0.0868519	0.120376	8e-05	0.085298	0.583046	0.81073	2.28953	0.0602114
GmWRI14 -3	0.346358		5.61496	0.0820119	1.78546	0.185326	0.393324	0.167321	0.0875764	0.0414126	0.051205	0.072122	0.112412	0	0.079928	0.711823	1.08172	2.72513	0.0622134
lectin gene	1.42311		1.34762	1.37623
